# Supplementary material
Source: publisher site journal article supplement (https://www.dovepress.com/article/368912)
Supplement: Supplementary file 1 [file get_supplementary_file.php]

**Supplementary Table Sequences of primers for the amplification of SCC*mec* and VNTRs types and corresponding band sizes of products**

| **Marker Locus** | **Primers** | **Oligonucleotide sequence (5′-3′)** | **Specificity** | **Amplicon size (bp)** |
| --- | --- | --- | --- | --- |
| SCC*mec* type I | Type I-F | GCTTTAAAGAGTGTCGTTACAGG | SCC*mec* I | 613 |
| Type I-R | GTTCTCTCATAGTATGACGTCC |
| SCC*mec* type II | Type II-F | CGTTGAAGATGATGAAGCG | SCC*mec* II | 398 |
| Type II-R | CGAAATCAATGGTTAATGGACC |
| SCC*mec* type III and III A | Type III-F | CCATATTGTGTACGATGCG | SCC*mec* III | 280 |
| Type III-R | CCTTAGTTGTCGTAACAGATCG |
| Type III-F5 | TTCTCATTGATGCTGAAGCC | SCC*mec* IIIA | 257 |
| Type III-R6 | GTGTAATTTCTTTTGAAAGATATGG |
| SCC*mec* type IV | Type IVa-F | GCCTTATTCGAAGAAACCG | SCC*mec* Iva | 776 |
| Type IVa-R | CTACTCTTCTGAAAAGCGTCG |
| Type IVb-F | TCTGGAATTACTTCAGCTGC | SCC*mec* IVb | 493 |
| Type IVb-R | AAACAATATTGCTCTCCCTC |
| Type IVc-F2 | CCTGAATCTAAAGAGATACACCG | SCC*mec* IVC, IVE | 200 |
| Type IVc-R2 | GGTTATTTTCATAGTGAATCGC |
| Type IVd-F5 | CTCAAAATACGGACCCCAATACA | SCC*mec* IVD | 881 |
| Type IVd-R6 | TGCTCCAGTAATTGCTAAAG |
| Type IVE-F3 | CAGATTCATCATTTCAAAGGC | SCC*mec* IVE, IVF | 175 |
| Type IVE-R4 | AACAACTATTAGATAATTTCCG |
| SCC*mec* type V | Type V-F | GAACATTGTTACTTAAATGAGCG | SCC*mec* V | 325 |
| Type V-R | TGAAAGTTGTACCCTTGACACC |
| SCC*mec* type XI | mecIF | GACACGTGAAGGCTATGATATAT | *mec 1* | 344 |
| mecIR | ATTCTTCAATATCATCTTCGGAC |  |
| mecR1F | GGCTCAGTTAAATCATAAAGTTTG | *mecR1* | 710 |
| mec R1 R | AAATTGCCTTACCATAGCTTGTGT |  |
| ccrAF | GCAATAGGTTATCTACGTCAAAG | *ccrA1* | 932 |
| ccrAR | TCTAATGATTGTGCGTTGATTCC |  |
| ccrBF | TTCGTGTATCGACAGAAATGCAG | *ccrB3* | 1499 |
| ccrBR | CATCTTTACGAATATCAATACGG |  |
| blaZF | AGTCGTGTTAGCGTTGATATTAA | *blaZ* | 809 |
|  | CAATTTCAGCAACCTCACTTACTA |  |
| *ClfA* | ClfA (F)  ClfA (R) | GATTCTGACCCAGGTTCAGA  CTGTATCTGGTAATGGTTCTTT | 945 | 18 |
| *ClfB* | ClfB (F)  ClfB (R) | ATGGTGATTCAGCAGTAAATCC  CATTATTTGGTGGTGTAACTCTT | 880 | 18 |
| *SdrCDE* | SdrCDE (F)  SdrCDE (R) | GTAACAATTACGGATCATGATG  TACCTGTTTCTGGTAATGCTTT | 664/580/622 | 18 |
| *Spa* | Spa (F)  Spa (R) | AGCACCAAAAGAGGAAGACAA­  GTTTAACGACATGTACTCCGT | 290 | 9 |
| *SspA* | Ssp (F)  Ssp (R) | ATCMATTTYGCMAAYGATGACCA  TTGTCTGAATTATTGTTATCGCC | 132 | 24 |
